# Supplementary material for: When your host shuts down: larval diapause impacts host-microbiome interactions in Nasonia vitripennis
Source: PubMed Central journal article supplement (PMC8035746; doi:10.1186/s40168-021-01037-6), 2021-04-09
Supplement: 40168_2021_1037_MOESM3_ESM.pdf [file 40168_2021_1037_MOESM3_ESM.pdf]

## Larvae

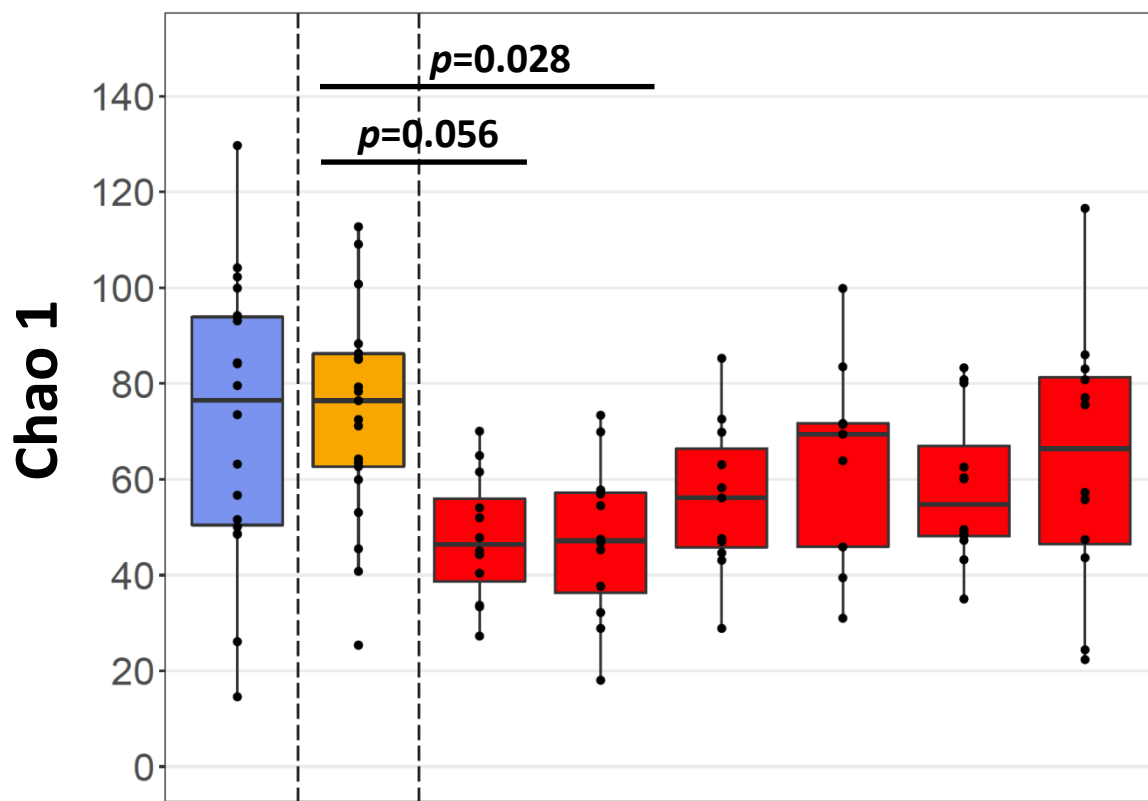

## Adults

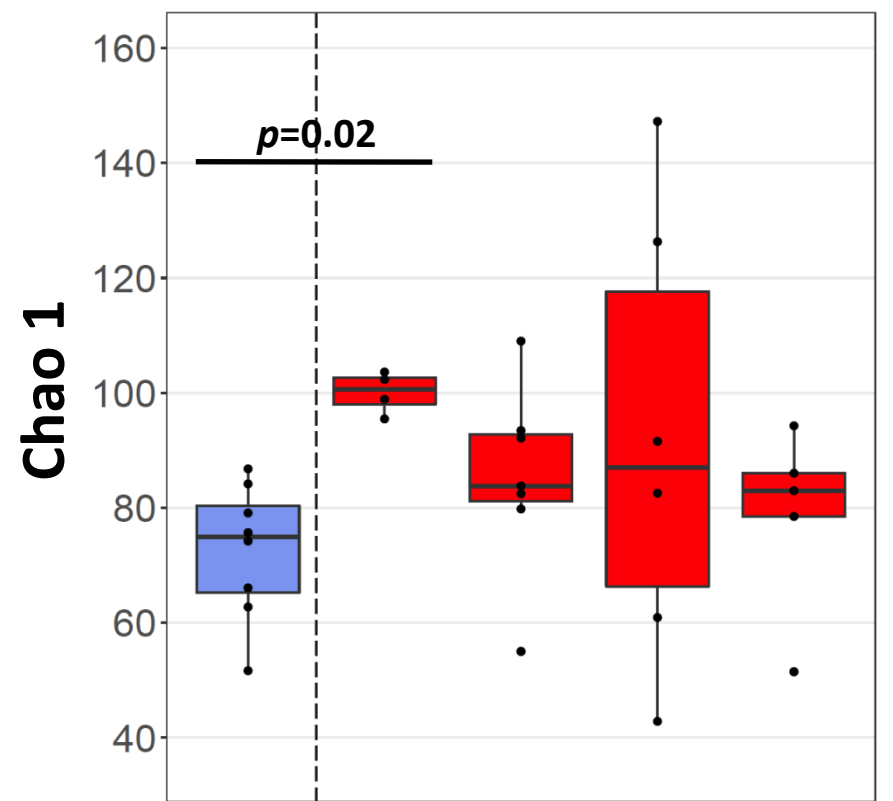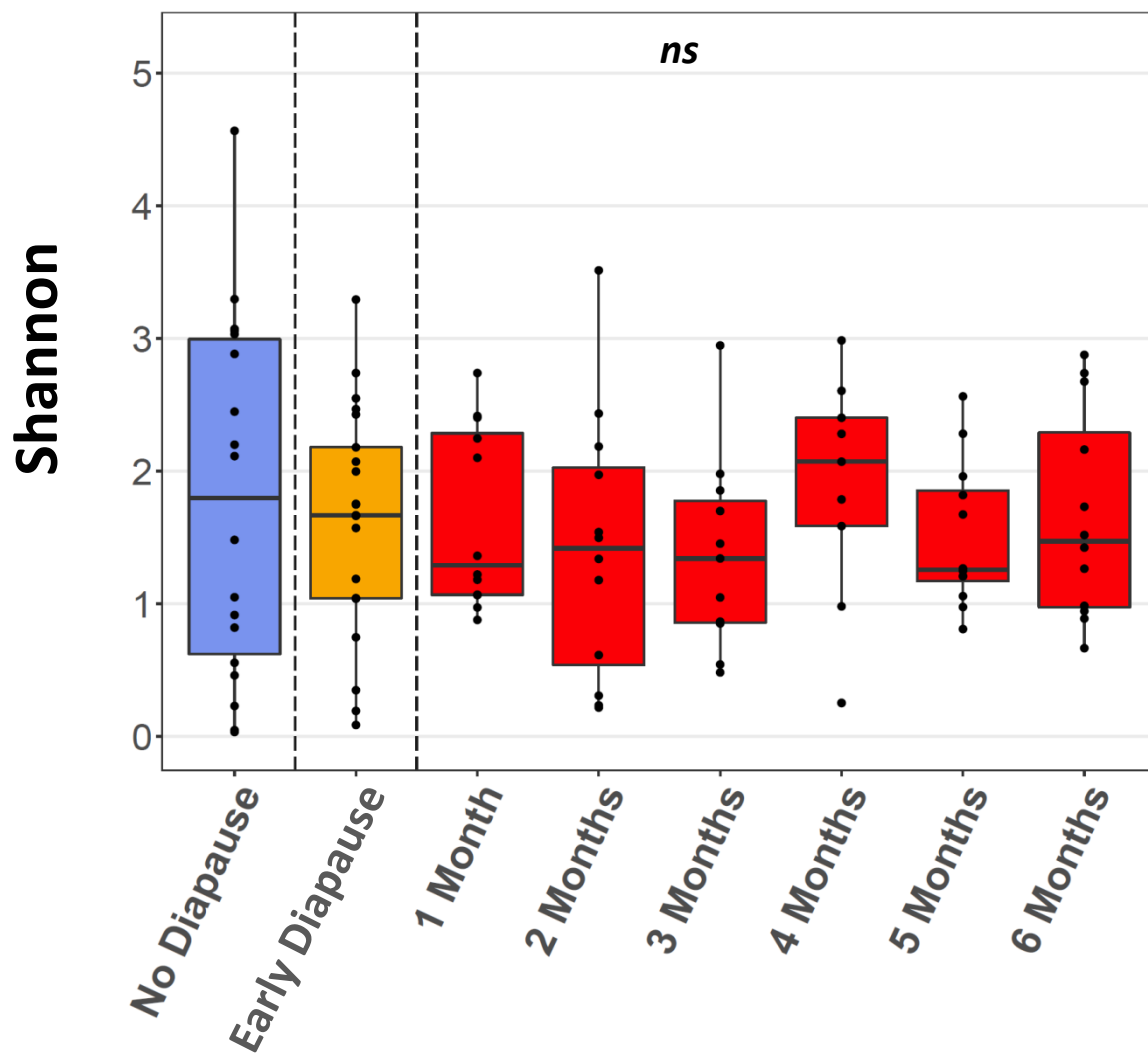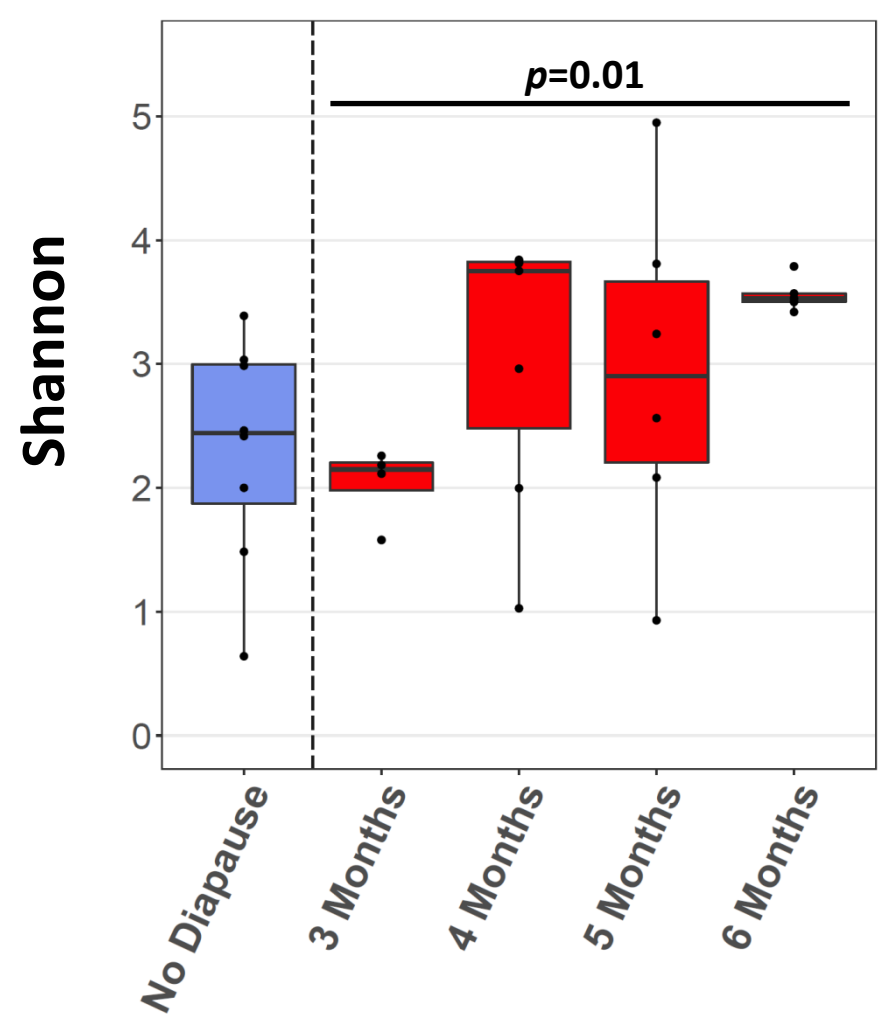

**Supplementary Figure S2.** Bacterial richness and diversity in larvae and adults based on the species richness estimator Chao 1 and the Shannon Index of diversity. Alphadiversity indices were compared between experimental conditions using pairwise t-tests after 1000 Monte-Carlo permutations.
