# Supplementary material for: When your host shuts down: larval diapause impacts host-microbiome interactions in Nasonia vitripennis
Source: PubMed Central journal article supplement (PMC8035746; doi:10.1186/s40168-021-01037-6), 2021-04-09
Supplement: 40168_2021_1037_MOESM4_ESM.pdf [file 40168_2021_1037_MOESM4_ESM.pdf]

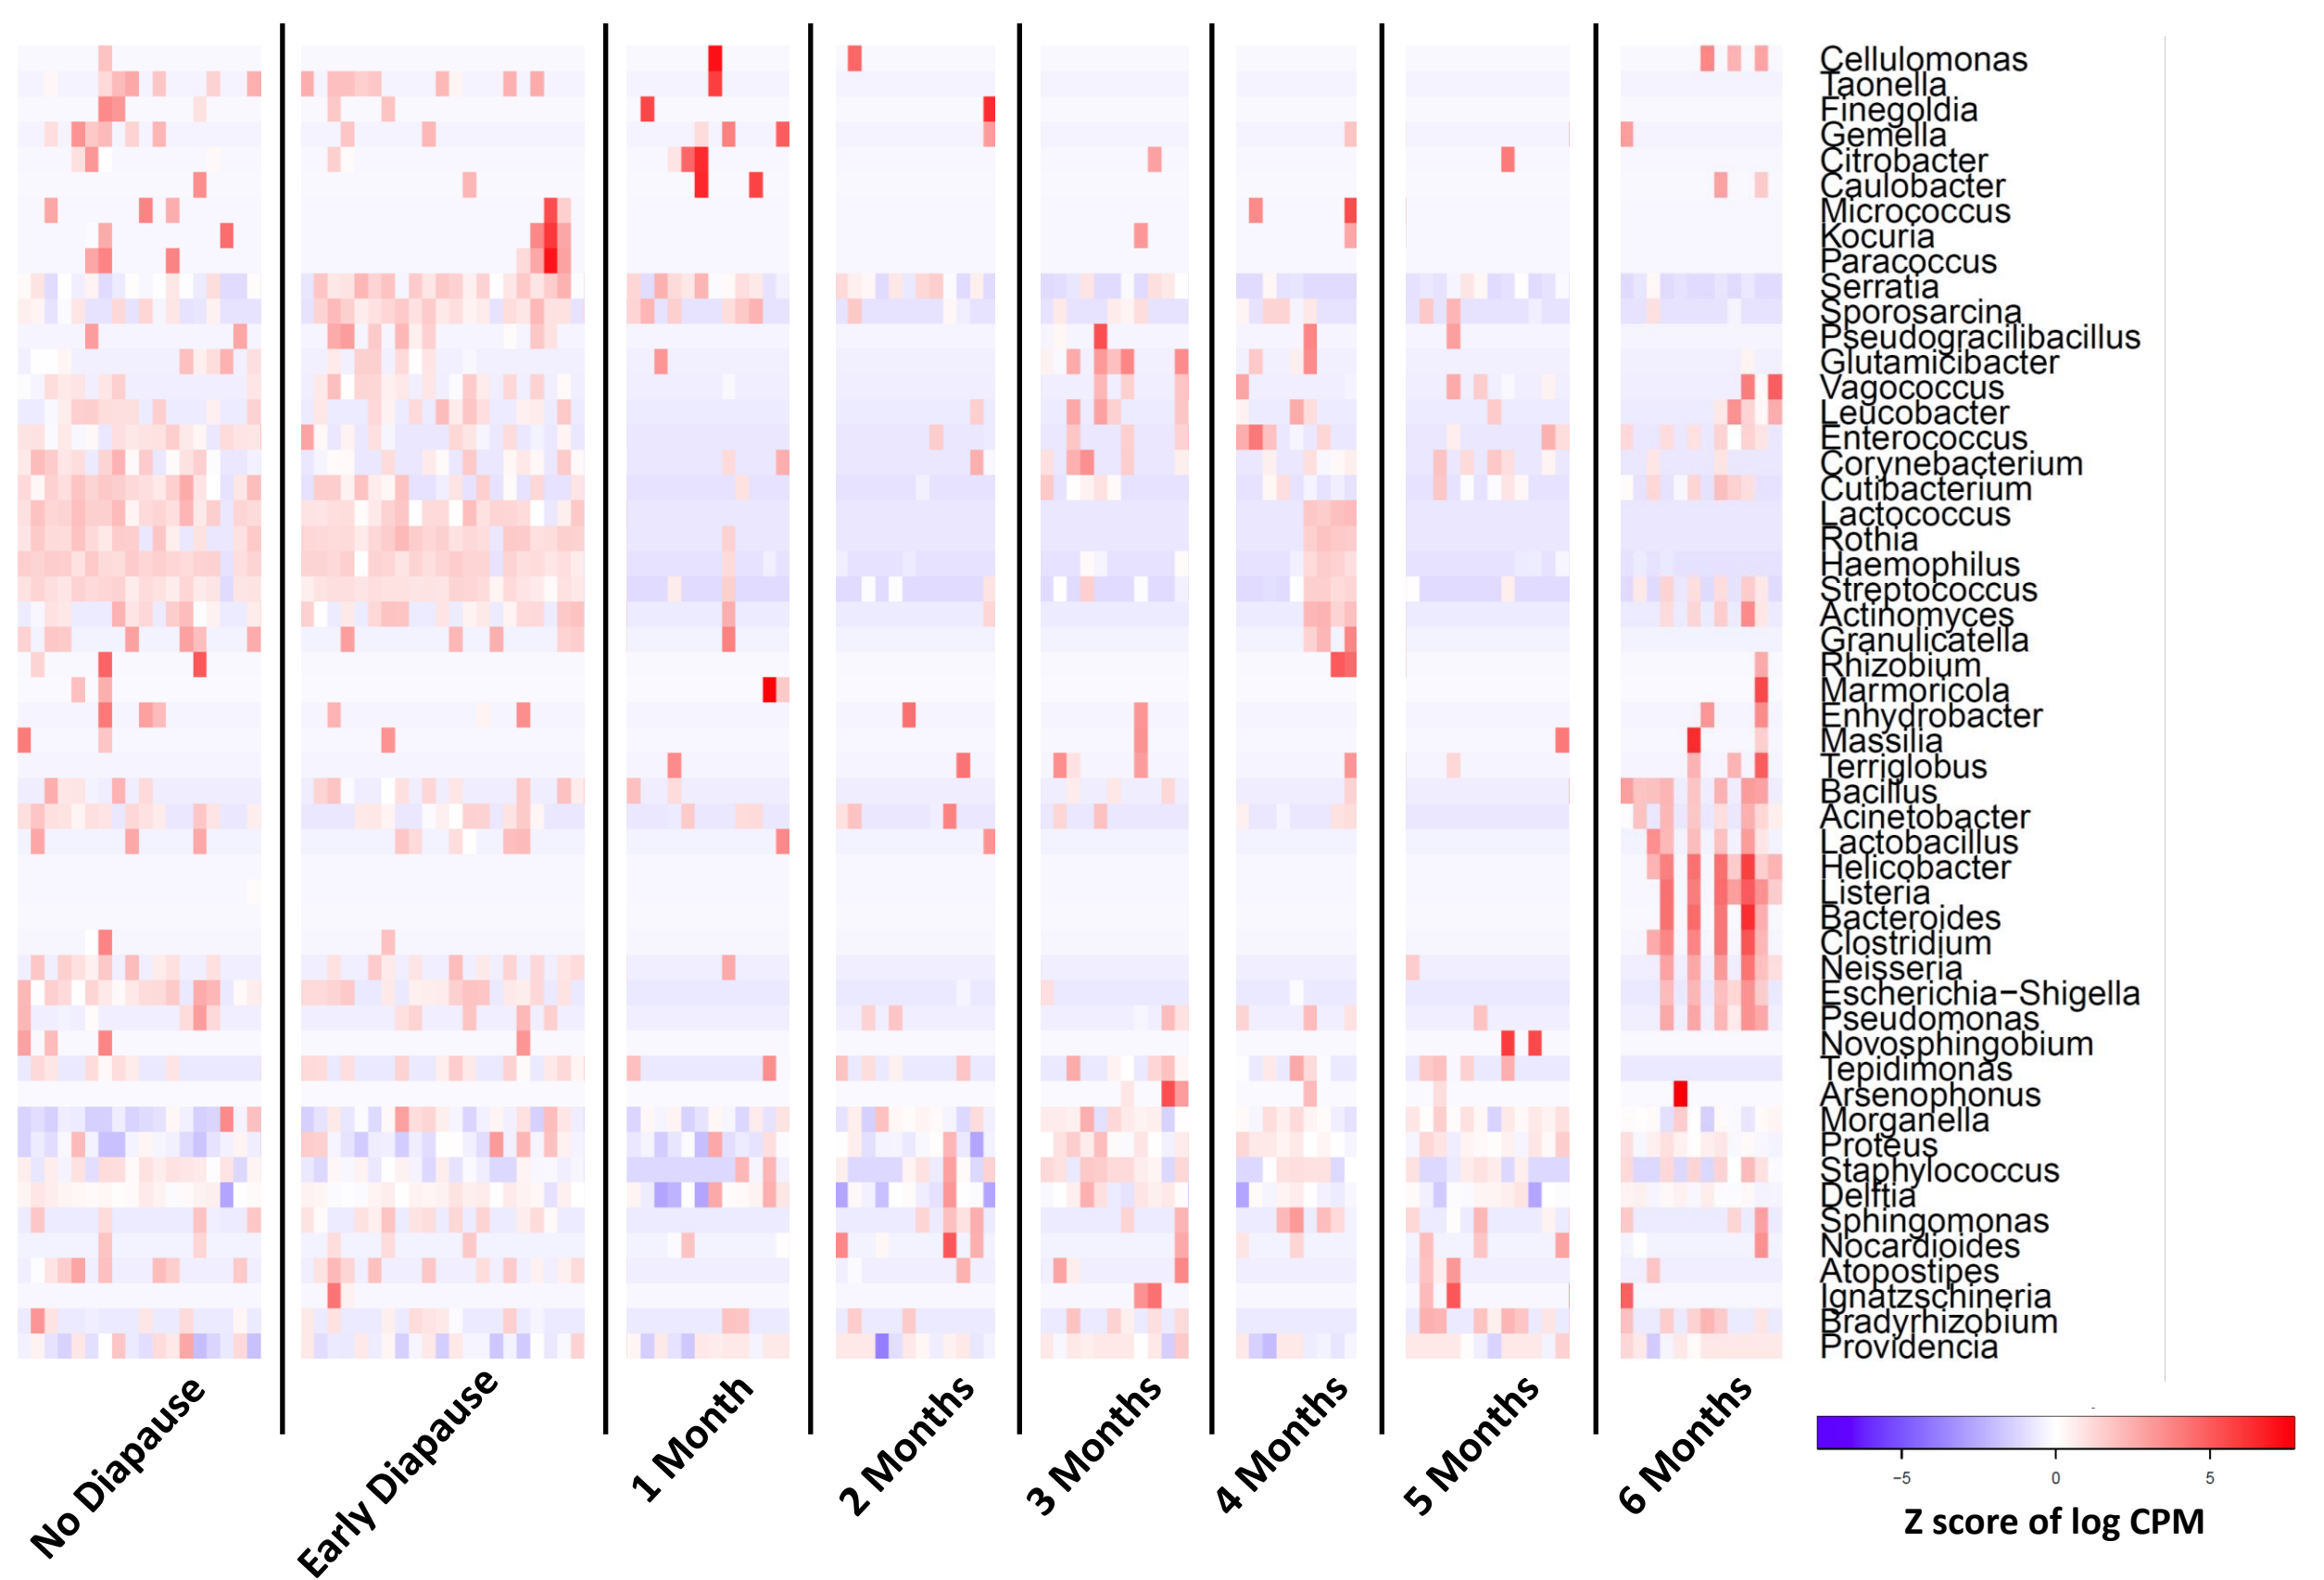

**Supplementary Figure S3.** Abundance of 52 genera in each replicate larvae sample. Each genus was differentially abundant in at least one diapause condition compared to non-diapausing larvae. Rows are ordered based on abundance patterns using hierarchical clustering. A summarized version showing the mean abundances of these genera per experimental condition is shown in Fig. 4.
