# Supplementary material for: When your host shuts down: larval diapause impacts host-microbiome interactions in Nasonia vitripennis
Source: PubMed Central journal article supplement (PMC8035746; doi:10.1186/s40168-021-01037-6), 2021-04-09
Supplement: 40168_2021_1037_MOESM5_ESM.pdf [file 40168_2021_1037_MOESM5_ESM.pdf]

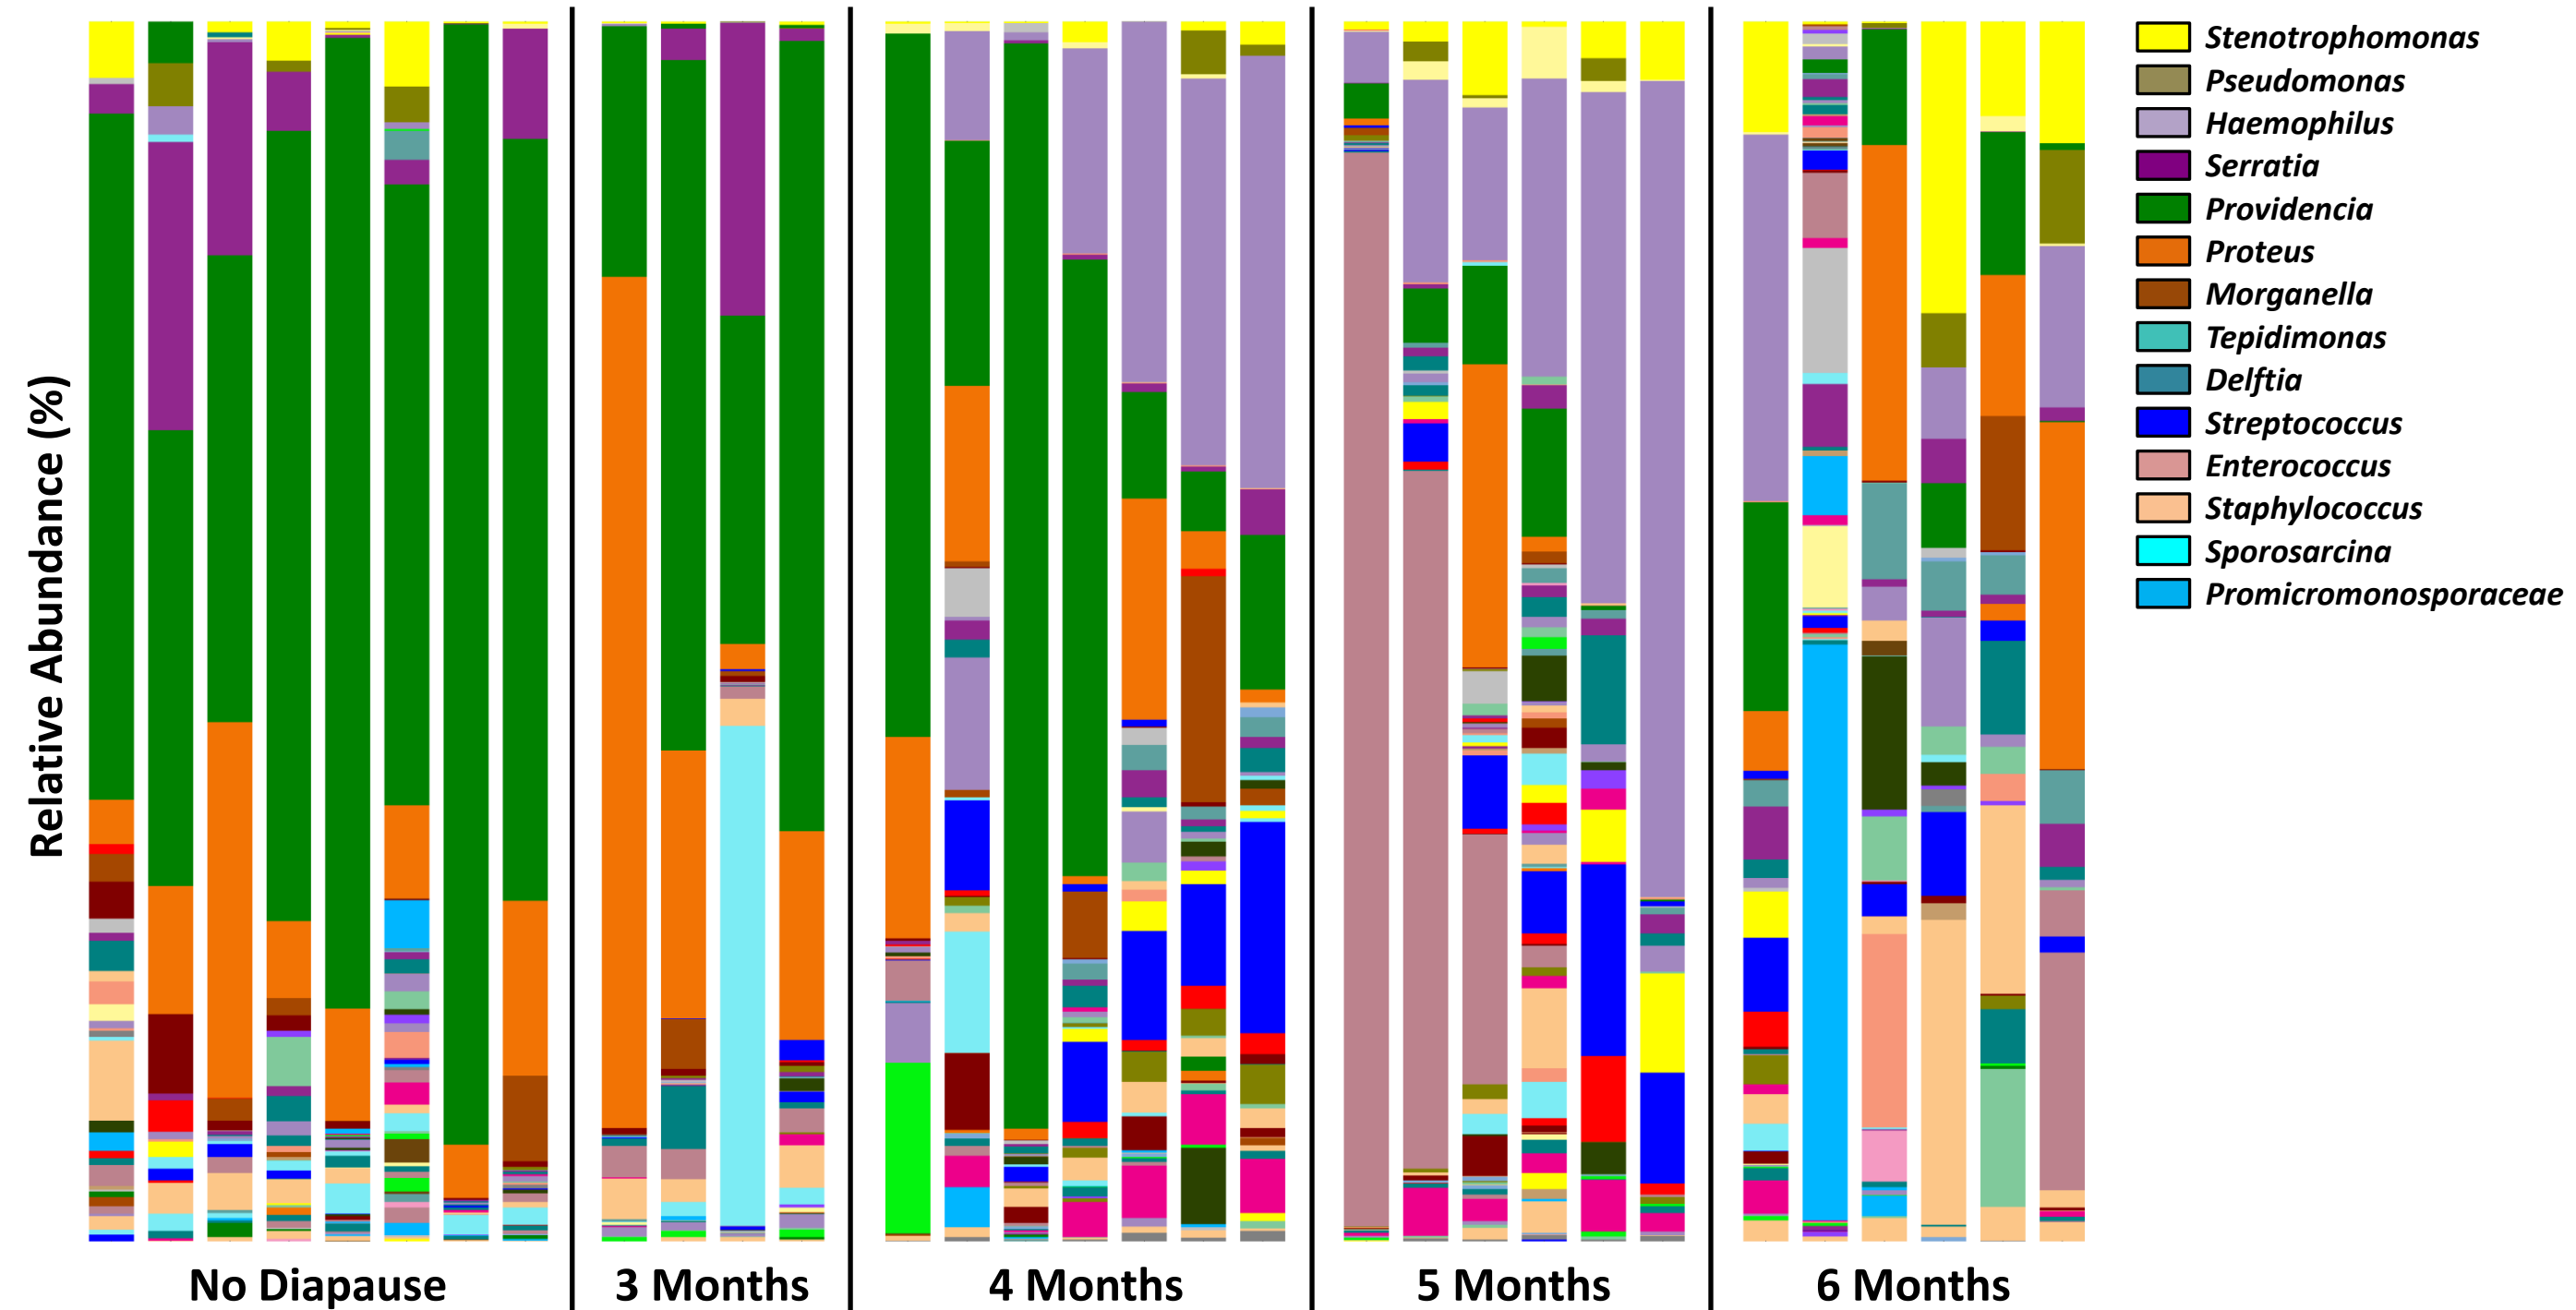

**Supplementary Figure S4.** Adult microbiome composition in each replicate sample. Each sample represents a pool of 2-6 siblings. See Supplementary Table 1 for detailed information on each sample. The most abundant bacterial genera are represented in the legend.
